# Supplementary material for: Selective Inhibition of PDE4B Reduces Binge Drinking in Two C57BL/6 Substrains
Source: MDPI journal article supplement (doi:10.3390/ijms22115443), 2021-05-21
Supplement: s1 [file s1]

## Supplemental Results

Experiment 1: Assessment of A33 effects on alcohol-induced changes in motor activity in alcohol/A33-experienced mice.

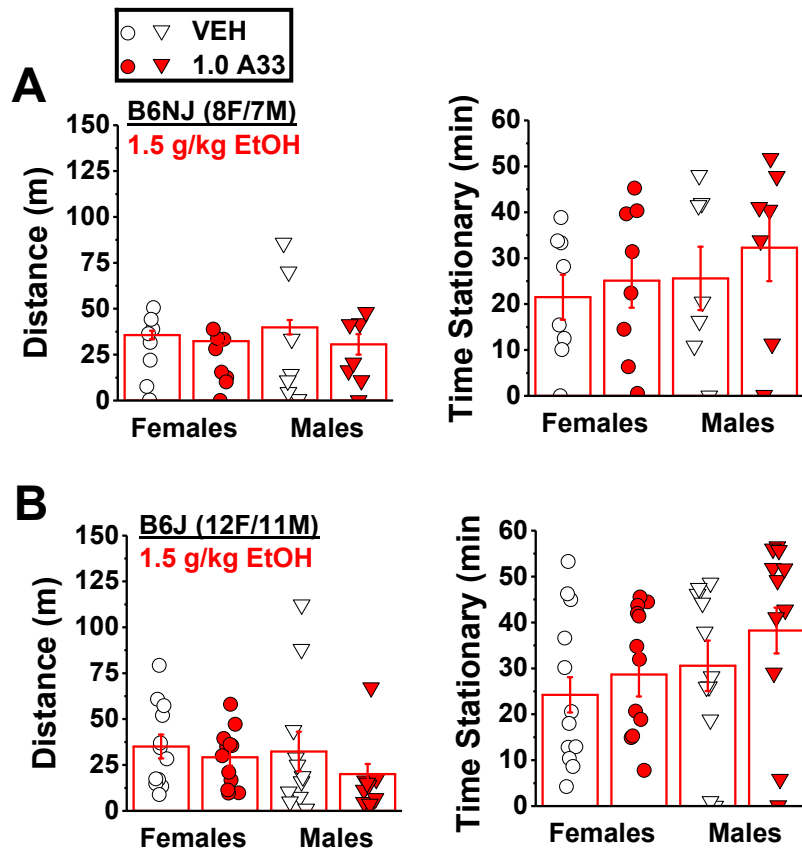

Suppl. Figure S1. Effect of A33 on alcohol-induced locomotor activity. Summary of the effect of vehicle (VEH) or A33 pretreatment (30 min earlier) upon (A) the total distance traveled and time spent stationary by B6NJ mice during a 2-h test post-injection with 1.5 g/kg of alcohol (EtOH). (B) Same as Panel A for B6J mice. The data represent the mean  $\pm$  SEM of the number of mice indicated, in addition to the individual datapoints for each experimental group. \* $p < 0.05$  vs. 0 mg/kg of A33 (main effect); + $p < 0.05$  vs. females (main effect).
